# Supplementary material for: Multi-Year Comparison of Community- and Species-Level West Nile Virus Antibody Prevalence in Birds from Atlanta, Georgia and Chicago, Illinois, 2005–2016
Source: PubMed Central journal article supplement (PMC9896344; doi:10.4269/ajtmh.21-1086), 2022-12-26
Supplement: tpmd211086.SD1.pdf [file tpmd211086.SD1.pdf]

## Supporting Information for:

**Title:** Multi-year comparison of community- and species-level West Nile virus antibody prevalence in birds from Atlanta, Georgia and Chicago, Illinois USA 2005 - 2016

**Authors:** Joseph R. McMillan<sup>1</sup>, Gabriel L. Hamer<sup>2</sup>, Rebecca Levine<sup>1</sup>, Daniel G. Mead<sup>3</sup>, Lance A. Waller<sup>1,4</sup>, Tony Goldberg<sup>5</sup>, Edward Walker<sup>6</sup>, Jeffrey Brawn<sup>7</sup>, Marilyn O. Ruiz<sup>8</sup>, Uriel Kitron<sup>1,9</sup>, Gonzalo Vazquez-Prokopec<sup>1,9\*\*</sup>

### Author Affiliations:

<sup>1</sup>Program in Population Biology, Ecology and Evolution, Emory University, Atlanta, GA, USA

<sup>2</sup>Department of Entomology, Texas A&M University, College Station, TX, USA

<sup>3</sup>Southeastern Cooperative Wildlife Disease Study, University of Georgia, Athens, GA, USA

<sup>4</sup>Department of Biostatistics and Bioinformatics, Rollins School of Public Health, Emory University

<sup>5</sup>Department of Pathobiological Sciences, School of Veterinary Medicine, University of Wisconsin-Madison, Madison, WI, USA

<sup>6</sup>Department of Microbiology and Molecular Genetics, Michigan State University, East Lansing, MI, USA

<sup>7</sup>Department of Natural Resources and Environmental Sciences, University of Illinois Champaign-Urbana, Urbana, IL, USA

<sup>8</sup>*Deceased* – Department of Pathobiology, University of Illinois Champaign-Urbana

<sup>9</sup>Department of Environmental Sciences, Emory University

**Author Email:** jrmcmil@emory.edu, ghamer@tamu.edu, rclevin@[alum.emory.edu](mailto:alum.emory.edu), dmead@uga.edu, lwaller@emory.edu, tony.goldberg@wisc.edu, walker@msu.edu, jbrawn@illinois.edu, [mailto:ukitron@emory.edu](mailto:mailto:ukitron@emory.edu), [gmvazqu@emory.edu](mailto:gmvazqu@emory.edu)

### \*\*\*Corresponding Author

Gonzalo Vazquez-Prokopec

400 Dowman Drive

Math and Science Center, 5th floor, Suite E530

Department of Environmental Sciences, Emory University.

Atlanta, GA, 30322, USA.

Tel: (404) 727-4217; fax: (404) 727-4448.

Email: [gmvazqu@emory.edu](mailto:gmvazqu@emory.edu)

**Keywords:** antibody, West Nile virus, serology, northern cardinal, American robin

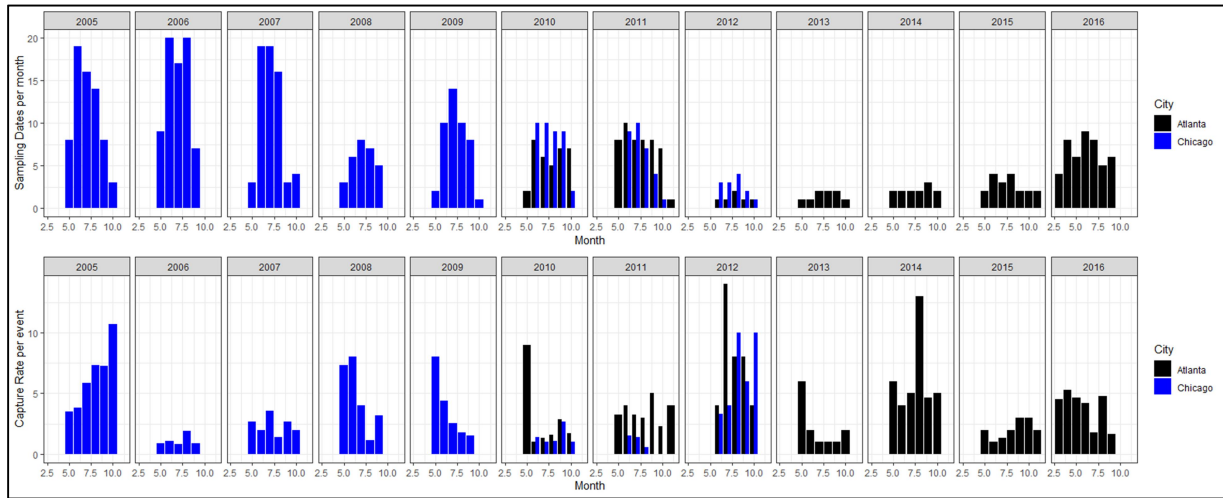

**S. Figure 1.** Sampling effort and capture rates per sampling event in Atlanta, GA and Chicago, IL 2010 - 2012.

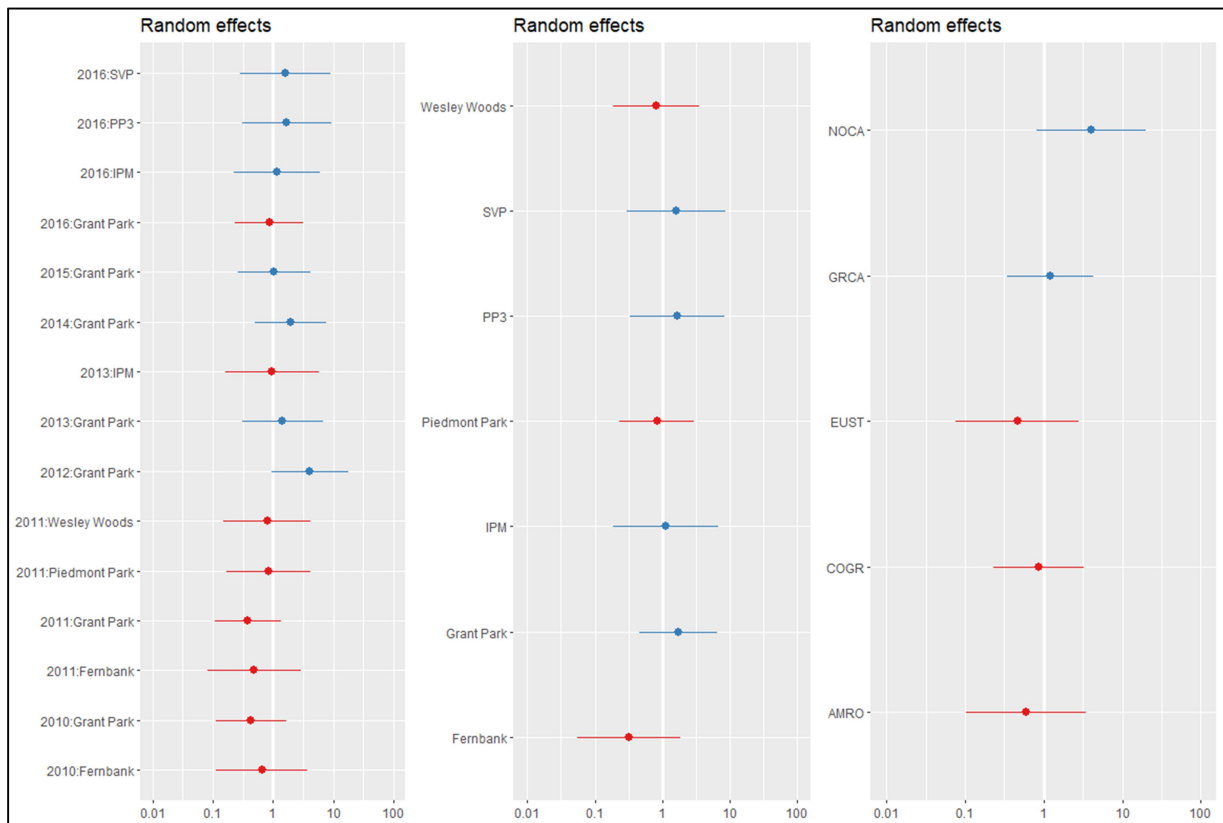

**S. Figure 2.** The random effect predictions – shown as an odds ratio - of a bird testing positive for West Nile virus antibodies in Atlanta, GA 2010 - 2016. Predictions were generated from a binomial-error generalized linear mixed effect model (GLMM) with West Nile virus antibody detection as the response term, Month, Age, and a Month by Age interaction term as fixed effects, Species as a crossed random effect, and Year and Location as nested random effects. The left plot displays the odds for the nested effect of Years by Site; the middle plot displays the odds for the crossed effect of Site; the right plot displays the odds for the crossed effect of Species. Colors indicate whether the estimate is below (red) or above (blue) 1. Points represent the estimate while lines represent the 95% CI of the estimate. 95% CI that do not include unity would be considered significant. 95%CI that do not overlap between random effect terms would also be considered significant.

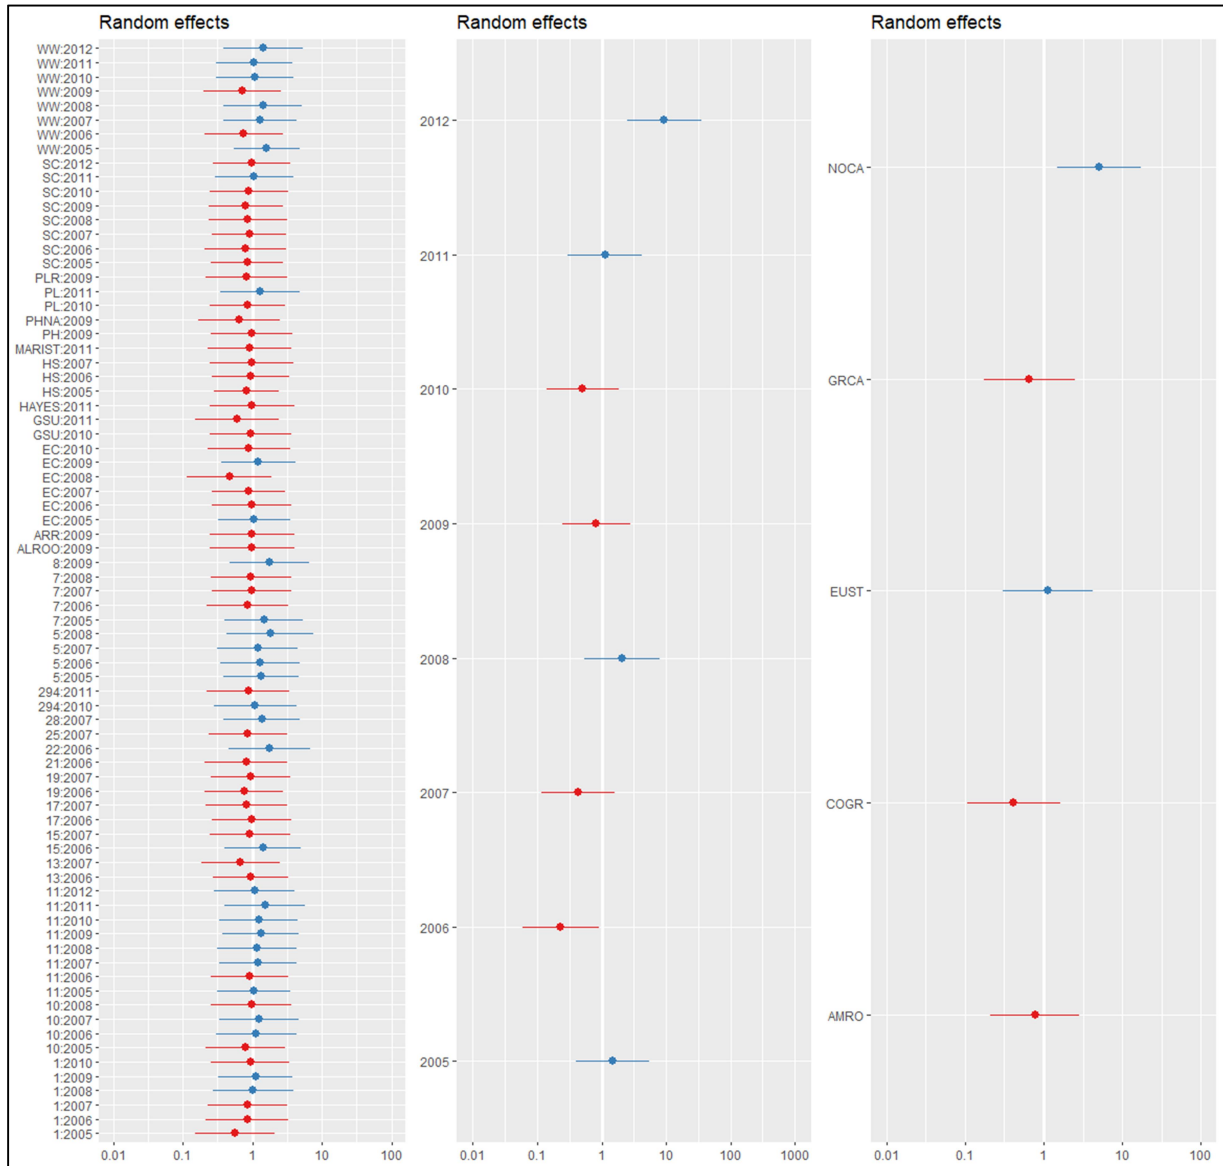

**S. Figure 3.** The random effect predictions – shown as an odds ratio - of a bird testing positive for West Nile virus antibodies in Chicago, IL 2005 - 2012. Predictions were generated from a binomial-error generalized linear mixed effect model (GLMM) with West Nile virus antibody detection as the response term, Month, Age, and a Month by Age interaction term as fixed effects, Species as a crossed random effect, and Location and Year as nested random effects. The left plot displays the odds for the nested effect of Site by Year; the middle plot displays the odds for the crossed effect of Year; the right plot displays the odds for the crossed effect of Species. Colors indicate whether the estimate is below (red) or above (blue) 1. Points represent the estimate while lines represent the 95% CI of the estimate. 95% CI that do not include unity would be considered significant. 95%CI that do not overlap between random effect terms would also be considered significant.

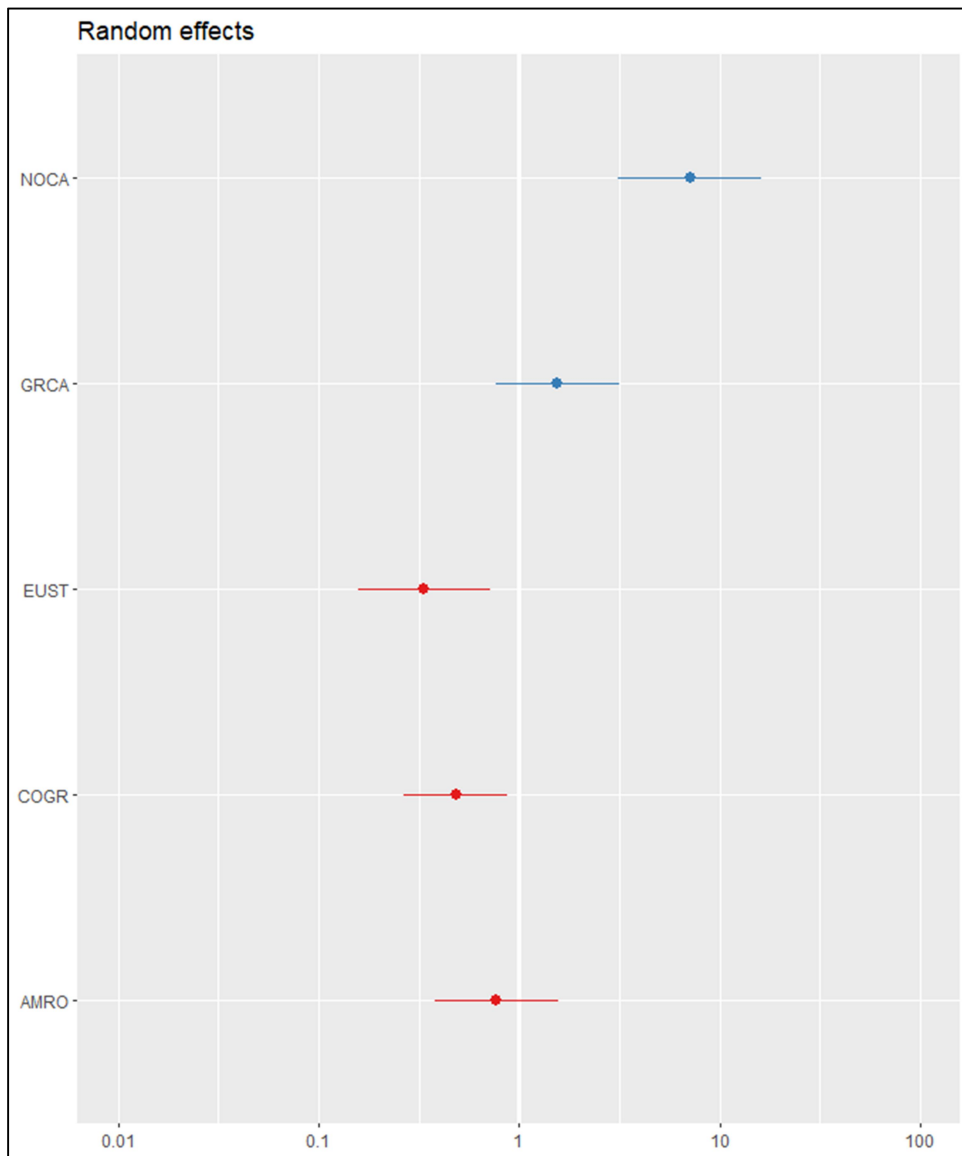

**S. Figure 4.** The random effect predictions – shown as an odds ratio - of a bird testing positive for West Nile virus antibodies in Atlanta, GA and Chicago, IL 2010 - 2012. Predictions were generated from a binomial-error generalized linear mixed effect model (GLMM) with West Nile virus antibody detection as the response term, Month, Age, Year, and a Month by Age interaction term as fixed effects, Species as a crossed random effect, and Location and Species as nested random effects. The plot displays the odds for the crossed effect of Species. Colors indicate whether the estimate is below (red) or above (blue) 1. Points represent the estimate while lines represent the 95% CI of the estimate. 95% CI that do not include unity would be considered significant. 95%CI that do not overlap between random effect terms would also be considered significant.

## Supporting Information for:

**Title:** Multi-year comparison of community- and species-level West Nile virus antibody prevalence in birds from Atlanta, Georgia and Chicago, Illinois USA 2005 - 2016

**Authors:** Joseph R. McMillan<sup>1</sup>, Gabriel L. Hamer<sup>2</sup>, Rebecca Levine<sup>1</sup>, Daniel G. Mead<sup>3</sup>, Lance A. Waller<sup>1,4</sup>, Tony Goldberg<sup>5</sup>, Edward Walker<sup>6</sup>, Jeffrey Brawn<sup>7</sup>, Marilyn O. Ruiz<sup>8</sup>, Uriel Kitron<sup>1,9</sup>, Gonzalo Vazquez-Prokopec<sup>1,9\*\*</sup>

### Author Affiliations:

<sup>1</sup>Program in Population Biology, Ecology and Evolution, Emory University, Atlanta, GA, USA

<sup>2</sup>Department of Entomology, Texas A&M University, College Station, TX, USA

<sup>3</sup>Southeastern Cooperative Wildlife Disease Study, University of Georgia, Athens, GA, USA

<sup>4</sup>Department of Biostatistics and Bioinformatics, Rollins School of Public Health, Emory University

<sup>5</sup>Department of Pathobiological Sciences, School of Veterinary Medicine, University of Wisconsin-Madison, Madison, WI, USA

<sup>6</sup>Department of Microbiology and Molecular Genetics, Michigan State University, East Lansing, MI, USA

<sup>7</sup>Department of Natural Resources and Environmental Sciences, University of Illinois Champaign-Urbana, Urbana, IL, USA

<sup>8</sup>*Deceased* – Department of Pathobiology, University of Illinois Champaign-Urbana

<sup>9</sup>Department of Environmental Sciences, Emory University

**Author Email:** jrmcmil@emory.edu, ghamer@tamu.edu, rclevin@[alum.emory.edu](mailto:rclewin@alum.emory.edu), dmead@uga.edu, lwaller@emory.edu, tony.goldberg@wisc.edu, walker@msu.edu, jbrawn@illinois.edu, [mailto:ukitron@emory.edu](mailto:mailto:ukitron@emory.edu), [gmvazqu@emory.edu](mailto:gmvazqu@emory.edu)

### \*\*\*Corresponding Author

Gonzalo Vazquez-Prokopec

400 Dowman Drive

Math and Science Center, 5th floor, Suite E530

Department of Environmental Sciences, Emory University.

Atlanta, GA, 30322, USA.

Tel: (404) 727-4217; fax: (404) 727-4448.

Email: [gmvazqu@emory.edu](mailto:gmvazqu@emory.edu)

**Keywords:** antibody, West Nile virus, serology, northern cardinal, American robin

| Species | Atlanta, GA 2010 - 2016 |             |           |       |        |                    |             |                   | Chicago, IL 2005 - 2012 |             |           |       |        |                    |             |                   |
|---------|-------------------------|-------------|-----------|-------|--------|--------------------|-------------|-------------------|-------------------------|-------------|-----------|-------|--------|--------------------|-------------|-------------------|
|         | Status                  | Sample Size | Locations | Years | Adults | WNV seroprevalence | Hatch years | WNV seroincidence | Status                  | Sample Size | Locations | Years | Adults | WNV seroprevalence | Hatch years | WNV seroincidence |
| AMGO    |                         |             |           |       |        |                    |             |                   | Resident                | 258         | 17        | 8     | 240    | 6%                 | 18          | 0%                |
| AMRE    |                         |             |           |       |        |                    |             |                   | Summer                  | 6           | 5         | 4     | 5      | 0%                 | 1           | 0%                |
| AMRO    | Resident                | 237         | 11        | 7     | 145    | 28%                | 92          | 12%               | Resident                | 1005        | 28        | 8     | 473    | 14%                | 532         | 4%                |
| AMWO    |                         |             |           |       |        |                    |             |                   | Summer                  | 1           | 1         | 1     | 0      |                    | 1           | 0%                |
| ATSP    |                         |             |           |       |        |                    |             |                   | Winter                  | 1           | 1         | 1     | 1      | 0%                 |             |                   |
| BAOR    |                         |             |           |       |        |                    |             |                   | Summer                  | 31          | 7         | 7     | 26     | 8%                 | 5           | 20%               |
| BARS    |                         |             |           |       |        |                    |             |                   | Summer                  | 6           | 1         | 2     | 2      | 0%                 | 4           | 0%                |
| BAWW    | Summer                  | 1           | 1         | 1     | 1      | 0%                 |             |                   | Summer                  | 3           | 3         | 3     | 1      | 0%                 | 2           | 0%                |
| BBCU    |                         |             |           |       |        |                    |             |                   | Summer                  | 2           | 1         | 2     |        |                    | 2           | 0%                |
| BCCH    |                         |             |           |       |        |                    |             |                   | Resident                | 26          | 9         | 7     | 21     | 0%                 | 5           | 0%                |
| BHCO    | Resident                | 5           | 2         | 3     | 5      | 20%                |             |                   | Resident                | 56          | 10        | 8     | 43     | 5%                 | 13          | 15%               |
| BLJA    | Resident                | 22          | 7         | 6     | 15     | 60%                | 7           | 29%               | Resident                | 22          | 10        | 5     | 11     | 36%                | 11          | 9%                |
| BLPW    |                         |             |           |       |        |                    |             |                   | Migrant                 | 2           | 1         | 2     | 1      | 0%                 | 1           | 0%                |
| BRTH    | Resident                | 71          | 9         | 7     | 58     | 48%                | 13          | 0%                | Summer                  | 6           | 3         | 4     | 5      | 40%                | 1           | 0%                |
| BTBW    |                         |             |           |       |        |                    |             |                   | Migrant                 | 2           | 1         | 1     | 2      | 0%                 |             |                   |
| CARW    | Resident                | 58          | 12        | 6     | 48     | 23%                | 10          | 10%               | Resident                | 2           | 2         | 2     | 2      | 0%                 |             |                   |
| CAWA    |                         |             |           |       |        |                    |             |                   | Migrant                 | 1           | 1         | 1     | 1      | 0%                 |             |                   |
| CEDW    | Winter                  | 1           | 1         | 1     | 1      | 0%                 |             |                   | Resident                | 17          | 6         | 5     | 16     | 7%                 | 1           | 0%                |
| CHSP    |                         |             |           |       |        |                    |             |                   | Summer                  | 21          | 9         | 6     | 17     | 12%                | 4           | 0%                |
| COGR    | Resident                | 39          | 5         | 7     | 33     | 39%                | 6           | 0%                | Resident                | 92          | 13        | 8     | 71     | 7%                 | 21          | 0%                |
| COYE    |                         |             |           |       |        |                    |             |                   | Summer                  | 7           | 3         | 4     | 6      | 17%                | 1           | 0%                |
| CSWA    | Migrant                 | 1           | 1         | 1     |        |                    | 1           | 0%                |                         |             |           |       |        |                    |             |                   |
| DOWO    | Resident                | 4           | 3         | 3     | 3      | 33%                | 1           | 0%                | Resident                | 43          | 14        | 8     | 29     | 7%                 | 14          | 7%                |
| EABL    | Resident                | 15          | 4         | 4     | 5      | 20%                | 10          | 10%               |                         |             |           |       |        |                    |             |                   |
| EAPH    | Resident                | 12          | 4         | 6     | 7      | 0%                 | 5           | 0%                | Summer                  | 1           | 1         | 1     | 1      | 0%                 |             |                   |
| EATO    | Resident                | 20          | 7         | 6     | 12     | 8%                 | 8           | 0%                | Summer                  | 2           | 1         | 1     | 2      | 0%                 |             |                   |
| EAWP    | Summer                  | 1           | 1         | 1     | 1      | 0%                 |             |                   | Summer                  | 1           | 1         | 1     |        |                    | 1           | 0%                |
| EUST    | Resident                | 40          | 5         | 6     | 19     | 0%                 | 21          | 5%                | Resident                | 122         | 14        | 8     | 47     | 11%                | 75          | 5%                |
| FOSP    |                         |             |           |       |        |                    |             |                   | Migrant                 | 3           | 1         | 2     |        |                    | 3           | 0%                |
| GCFL    | Summer                  | 3           | 3         | 2     | 3      | 0%                 |             |                   | Summer                  | 3           | 3         | 2     | 3      | 0%                 |             |                   |
| GCTH    | Migrant                 | 7           | 4         | 4     | 6      | 0%                 | 1           | 0%                | Migrant                 | 18          | 7         | 8     | 9      | 11%                | 9           | 11%               |

|      |          |     |    |   |     |      |    |     |          |      |    |   |     |     |      |     |
|------|----------|-----|----|---|-----|------|----|-----|----------|------|----|---|-----|-----|------|-----|
| GRCA | Summer   | 90  | 8  | 7 | 66  | 41%  | 24 | 25% | Summer   | 375  | 21 | 8 | 232 | 11% | 143  | 13% |
| HAWO |          |     |    |   |     |      |    |     | Resident | 1    | 1  | 1 |     |     | 1    | 0%  |
| HETH |          |     |    |   |     |      |    |     | Migrant  | 8    | 3  | 3 | 2   | 0%  | 6    | 0%  |
| HOFI | Resident | 5   | 4  | 3 | 4   | 25%  | 1  | 0%  | Resident | 135  | 12 | 7 | 52  | 23% | 83   | 10% |
| HOSP | Resident | 2   | 2  | 2 | 2   | 50%  |    |     | Resident | 1882 | 22 | 8 | 778 | 12% | 1104 | 7%  |
| HOWA | Summer   | 5   | 4  | 1 | 3   | 0%   | 2  | 0%  |          |      |    |   |     |     |      |     |
| HOWR | Resident | 1   | 1  | 1 | 1   | 100% |    |     | Summer   | 9    | 5  | 6 | 5   | 0%  | 4    | 0%  |
| INBU | Summer   | 1   | 1  | 1 |     |      | 1  | 0%  | Summer   | 16   | 9  | 7 | 14  | 0%  | 2    | 0%  |
| KEWA | Summer   | 1   | 1  | 1 | 1   | 0%   |    |     |          |      |    |   |     |     |      |     |
| KILL |          |     |    |   |     |      |    |     | Summer   | 1    | 1  | 1 | 1   | 0%  |      |     |
| LEFL |          |     |    |   |     |      |    |     | Summer   | 1    | 1  | 1 | 1   | 0%  |      |     |
| LISP |          |     |    |   |     |      |    |     | Migrant  | 3    | 3  | 3 | 2   | 0%  | 1    | 0%  |
| LOWA |          |     |    |   |     |      |    |     | Summer   | 1    | 1  | 1 | 1   | 0%  |      |     |
| MALL |          |     |    |   |     |      |    |     | Resident | 4    | 1  | 1 | 4   | 0%  |      |     |
| MAWA | Migrant  | 1   | 1  | 1 | 1   | 0%   |    |     | Migrant  | 7    | 3  | 3 | 3   | 0%  | 4    | 0%  |
| MODO | Resident | 1   | 1  | 1 |     |      | 1  | 0%  | Resident | 45   | 10 | 5 | 23  | 52% | 22   | 27% |
| MOWA |          |     |    |   |     |      |    |     | Migrant  | 1    | 1  | 1 | 1   | 0%  |      |     |
| MYWA |          |     |    |   |     |      |    |     | Migrant  | 17   | 5  | 3 | 7   | 0%  | 10   | 0%  |
| NAWA |          |     |    |   |     |      |    |     | Migrant  | 2    | 2  | 2 | 1   | 0%  | 1    | 0%  |
| NOCA | Resident | 183 | 12 | 7 | 121 | 61%  | 62 | 32% | Resident | 244  | 22 | 8 | 137 | 57% | 107  | 36% |
| NOMO | Resident | 93  | 7  | 7 | 51  | 55%  | 42 | 40% |          |      |    |   |     |     |      |     |
| NOWA | Migrant  | 6   | 3  | 3 | 6   | 0%   |    |     | Migrant  | 35   | 8  | 7 | 23  | 0%  | 12   | 0%  |
| NRWS |          |     |    |   |     |      |    |     | Summer   | 1    | 1  | 1 | 1   | 0%  |      |     |
| OROR |          |     |    |   |     |      |    |     | Summer   | 3    | 1  | 1 | 3   | 0%  |      |     |
| OSFL |          |     |    |   |     |      |    |     | Migrant  | 1    | 1  | 1 | 1   | 0%  |      |     |
| OVEN | Summer   | 2   | 2  | 1 | 2   | 0%   |    |     | Summer   | 31   | 11 | 7 | 13  | 0%  | 18   | 0%  |
| RBGR | Migrant  | 1   | 1  | 1 |     |      | 1  | 0%  | Summer   | 3    | 3  | 2 |     |     | 3    | 0%  |
| RBWO | Resident | 2   | 2  | 2 | 1   | 0%   | 1  | 0%  |          |      |    |   |     |     |      |     |
| REVI | Summer   | 4   | 1  | 2 | 4   | 0%   |    |     | Summer   | 12   | 7  | 6 | 12  | 0%  |      |     |
| RHWO | Resident | 1   | 1  | 1 | 1   | 0%   |    |     |          |      |    |   |     |     |      |     |
| RWBL | Resident | 1   | 1  | 1 | 1   | 0%   |    |     | Resident | 142  | 6  | 8 | 127 | 9%  | 15   | 13% |
| SAVS |          |     |    |   |     |      |    |     | Summer   | 2    | 1  | 2 |     |     | 2    | 0%  |
| SCJU |          |     |    |   |     |      |    |     | Winter   | 9    | 5  | 3 | 4   | 0%  | 5    | 0%  |
| SCTA |          |     |    |   |     |      |    |     | Summer   | 1    | 1  | 1 |     |     | 1    | 0%  |



|                     |          |      |      |     |     |      |     |    |          |      |      |      |      |     |      |     |
|---------------------|----------|------|------|-----|-----|------|-----|----|----------|------|------|------|------|-----|------|-----|
| SOSP                | Resident | 19   | 4    | 5   | 12  | 0%   | 7   | 0% | Resident | 203  | 11   | 8    | 116  | 3%  | 87   | 1%  |
| SWSP                |          |      |      |     |     |      |     |    | Winter   | 1    | 1    | 1    |      |     | 1    | 0%  |
| SWTH                | Migrant  | 23   | 6    | 6   | 20  | 5%   | 3   | 0% | Migrant  | 116  | 11   | 8    | 45   | 0%  | 71   | 1%  |
| TRES                |          |      |      |     |     |      |     |    | Summer   | 6    | 2    | 2    | 5    | 0%  | 1    | 0%  |
| TUTI                | Resident | 11   | 3    | 2   | 9   | 0%   | 2   | 0% |          |      |      |      |      |     |      |     |
| VEER                | Migrant  | 1    | 1    | 1   | 1   | 0%   |     |    | Summer   | 6    | 5    | 3    | 4    | 0%  | 2    | 0%  |
| WAVI                |          |      |      |     |     |      |     |    | Summer   | 27   | 4    | 7    | 19   | 0%  | 8    | 0%  |
| WBNU                | Resident | 9    | 4    | 4   | 9   | 22%  |     |    | Resident | 1    | 1    | 1    | 1    | 0%  |      |     |
| WCSP                |          |      |      |     |     |      |     |    | Winter   | 9    | 4    | 4    | 5    | 20% | 4    | 0%  |
| WIFL                |          |      |      |     |     |      |     |    | Summer   | 31   | 4    | 4    | 29   | 0%  | 2    | 50% |
| WOTH                | Summer   | 7    | 3    | 2   | 6   | 0%   | 1   | 0% | Summer   | 3    | 2    | 2    | 3    | 0%  |      |     |
| WPWA                |          |      |      |     |     |      |     |    | Migrant  | 3    | 1    | 1    |      |     | 3    | 0%  |
| WTSP                | Winter   | 11   | 4    | 3   | 10  | 0%   | 1   | 0% | Winter   | 61   | 10   | 6    | 28   | 4%  | 33   | 0%  |
| YBCH                | Summer   | 1    | 1    | 1   | 1   | 100% |     |    |          |      |      |      |      |     |      |     |
| YBFL                |          |      |      |     |     |      |     |    | Migrant  | 3    | 2    | 1    | 3    | 0%  |      |     |
| YSFL                | Resident | 3    | 2    | 3   | 3   | 0%   |     |    | Resident | 10   | 6    | 4    | 8    | 0%  | 2    | 0%  |
| Totals and Averages |          | 1022 | 3.66 | 3.2 | 698 | 18%  | 324 | 6% |          | 5232 | 5.36 | 3.71 | 2749 | 6%  | 2483 | 4%  |

**S. Table 1.** Collection and West Nile virus seroprevalence summaries for all bird species captured in Atlanta, Georgia (2010 – 2016) and Chicago, Illinois (2005 – 2012). The Species column contains the 4-letter alpha codes used by US-based bird banders to record and submit banding information. Actual species and common names can be found by performing an Internet search with the alpha codes or referencing an alpha-code manual.
